# Supplementary material for: Genome-Wide Comparison of Structural Variations and Transposon Alterations in Soybean Cultivars Induced by Spaceflight
Source: MDPI journal article supplement (doi:10.3390/ijms232213721), 2022-11-08
Supplement: s1 [file s1]

Table S1: Agronomic traits of Z9 and T75 in 2021 and 2022.

Table S2: Differential structural variations were detected between Z9 and T75.

Table S3: Differential transposable elements were detected between Z9 and T75.

Table S4: Differential genes detected between Z9 and T75.
